# Supplementary material for: Full-length transcriptome sequencing reveals the low-temperature-tolerance mechanism of Medicago falcata roots
Source: BMC Plant Biol. 2019 Dec 21;19:575. doi: 10.1186/s12870-019-2192-1 (PMC6925873; doi:10.1186/s12870-019-2192-1)
Supplement: Supplementary file 13 — Additional file 13: Table S10. Genetic modules and kME values of genes identified in the WGCNA results. [file 12870_2019_2192_MOESM13_ESM.xlsx]

## Sheet: Sheet1
Additional file 13: Table S10. Genetic modules and kME values of genes identified in the WGCNA results.
GeneID	kME	Module
F01.PB100108	0.754215	blue
F01.PB100176	0.945018	blue
F01.PB100191	0.910791	blue
F01.PB100290	0.931297	blue
F01.PB100451	0.843985	blue
F01.PB100487	0.805583	blue
F01.PB10059	0.776193	blue
F01.PB100749	0.798189	blue
F01.PB100882	0.701713	blue
F01.PB100895	0.956652	blue
F01.PB100985	0.883754	blue
F01.PB101147	0.854895	blue
F01.PB101174	0.767546	blue
F01.PB101237	0.892258	blue
F01.PB101452	0.823166	blue
F01.PB10147	0.73655	blue
F01.PB101734	0.734215	blue
F01.PB10186	0.761368	blue
F01.PB101890	0.761297	blue
F01.PB102004	0.933367	blue
F01.PB102157	0.707727	blue
F01.PB102430	0.901718	blue
F01.PB102539	0.805856	blue
F01.PB10264	0.905951	blue
F01.PB102750	0.870795	blue
F01.PB102780	0.889049	blue
F01.PB102844	0.919823	blue
F01.PB103046	0.723121	blue
F01.PB103375	0.880712	blue
F01.PB10350	0.912892	blue
F01.PB103504	0.930038	blue
F01.PB103903	0.766653	blue
F01.PB104128	0.914588	blue
F01.PB104132	0.934678	blue
F01.PB104204	0.934878	blue
F01.PB104273	0.916806	blue
F01.PB104456	0.913722	blue
F01.PB104501	0.728381	blue
F01.PB104624	0.83882	blue
F01.PB104668	0.749979	blue
F01.PB104696	0.837163	blue
F01.PB104719	0.745216	blue
F01.PB104728	0.850442	blue
F01.PB104781	0.934715	blue
F01.PB104829	0.933483	blue
F01.PB105046	0.802382	blue
F01.PB105049	0.732683	blue
F01.PB105059	0.874055	blue
F01.PB1052	0.85296	blue
F01.PB105387	0.786119	blue
F01.PB105415	0.857545	blue
F01.PB10561	0.94605	blue
F01.PB105804	0.890194	blue
F01.PB105909	0.842468	blue
F01.PB106197	0.706501	blue
F01.PB10638	0.778269	blue
F01.PB106674	0.810155	blue
F01.PB106696	0.899676	blue
F01.PB10675	0.821476	blue
F01.PB106788	0.951082	blue
F01.PB107124	0.760469	blue
F01.PB10714	0.839433	blue
F01.PB107405	0.91574	blue
F01.PB107465	0.703772	blue
F01.PB107501	0.92258	blue
F01.PB107510	0.979589	blue
F01.PB10752	0.787085	blue
F01.PB107536	0.818812	blue
F01.PB108076	0.860789	blue
F01.PB108465	0.924252	blue
F01.PB108473	0.754846	blue
F01.PB108543	0.734771	blue
F01.PB108554	0.884448	blue
F01.PB108636	0.702572	blue
F01.PB108722	0.866608	blue
F01.PB108970	0.965706	blue
F01.PB10904	0.79083	blue
F01.PB109113	0.839405	blue
F01.PB109373	0.742764	blue
F01.PB109436	0.773042	blue
F01.PB109438	0.880411	blue
F01.PB109587	0.968126	blue
F01.PB10960	0.726421	blue
F01.PB109620	0.784405	blue
F01.PB109894	0.91794	blue
F01.PB109900	0.827002	blue
F01.PB110057	0.701418	blue
F01.PB110081	0.91866	blue
F01.PB110083	0.704509	blue
F01.PB110168	0.936763	blue
F01.PB110235	0.917994	blue
F01.PB110295	0.763606	blue
F01.PB110330	0.903629	blue
F01.PB110473	0.718127	blue
F01.PB110812	0.921307	blue
F01.PB111017	0.820086	blue
F01.PB11106	0.916243	blue
F01.PB111131	0.941241	blue
F01.PB111389	0.766739	blue
F01.PB111771	0.950981	blue
F01.PB111816	0.777541	blue
F01.PB112043	0.883293	blue
F01.PB112321	0.858924	blue
F01.PB112358	0.889243	blue
F01.PB112382	0.847178	blue
F01.PB112505	0.809258	blue
F01.PB112751	0.791991	blue
F01.PB1130	0.948348	blue
F01.PB11306	0.923961	blue
F01.PB113206	0.736529	blue
F01.PB113230	0.907688	blue
F01.PB11331	0.940595	blue
F01.PB113350	0.94232	blue
F01.PB113442	0.913009	blue
F01.PB113602	0.873518	blue
F01.PB114607	0.765256	blue
F01.PB11496	0.909534	blue
F01.PB11502	0.729005	blue
F01.PB1153	0.820099	blue
F01.PB11655	0.910787	blue
F01.PB11696	0.757512	blue
F01.PB11703	0.938167	blue
F01.PB11747	0.80571	blue
F01.PB11761	0.962819	blue
F01.PB11798	0.825646	blue
F01.PB11809	0.900486	blue
F01.PB11852	0.881852	blue
F01.PB1187	0.799059	blue
F01.PB11912	0.79164	blue
F01.PB12098	0.973066	blue
F01.PB12192	0.790909	blue
F01.PB12203	0.94815	blue
F01.PB123	0.845175	blue
F01.PB12312	0.87319	blue
F01.PB12378	0.930971	blue
F01.PB12386	0.866208	blue
F01.PB12395	0.723433	blue
F01.PB12409	0.824966	blue
F01.PB12415	0.856359	blue
F01.PB12441	0.891375	blue
F01.PB1263	0.887746	blue
F01.PB12634	0.771521	blue
F01.PB12812	0.918141	blue
F01.PB12830	0.814869	blue
F01.PB12944	0.927405	blue
F01.PB12977	0.920066	blue
F01.PB13028	0.882466	blue
F01.PB13076	0.958697	blue
F01.PB1308	0.822439	blue
F01.PB13106	0.833454	blue
F01.PB13155	0.75146	blue
F01.PB1325	0.883644	blue
F01.PB13314	0.93886	blue
F01.PB13366	0.937094	blue
F01.PB13436	0.79387	blue
F01.PB1347	0.844005	blue
F01.PB13478	0.957954	blue
F01.PB13522	0.890346	blue
F01.PB1358	0.939385	blue
F01.PB13682	0.772567	blue
F01.PB13788	0.847942	blue
F01.PB13792	0.736944	blue
F01.PB13840	0.941908	blue
F01.PB14169	0.702393	blue
F01.PB14246	0.706611	blue
F01.PB14262	0.841034	blue
F01.PB14326	0.943825	blue
F01.PB14335	0.739457	blue
F01.PB14336	0.773044	blue
F01.PB14425	0.867396	blue
F01.PB14515	0.94502	blue
F01.PB14726	0.946529	blue
F01.PB14758	0.85841	blue
F01.PB14876	0.883008	blue
F01.PB14883	0.936572	blue
F01.PB1492	0.80329	blue
F01.PB14948	0.74297	blue
F01.PB15066	0.859391	blue
F01.PB15167	0.726916	blue
F01.PB15179	0.804887	blue
F01.PB15211	0.94869	blue
F01.PB15228	0.776329	blue
F01.PB15295	0.829167	blue
F01.PB15322	0.784179	blue
F01.PB15430	0.867631	blue
F01.PB15454	0.720607	blue
F01.PB15459	0.957468	blue
F01.PB15581	0.906231	blue
F01.PB15601	0.937706	blue
F01.PB15713	0.968456	blue
F01.PB15715	0.742028	blue
F01.PB15720	0.885326	blue
F01.PB15798	0.9216	blue
F01.PB1585	0.890832	blue
F01.PB15857	0.911719	blue
F01.PB15890	0.823829	blue
F01.PB15891	0.772243	blue
F01.PB15899	0.820011	blue
F01.PB15964	0.815429	blue
F01.PB15970	0.720949	blue
F01.PB15982	0.900487	blue
F01.PB16037	0.748469	blue
F01.PB16139	0.890962	blue
F01.PB16188	0.855103	blue
F01.PB16323	0.915469	blue
F01.PB16326	0.820073	blue
F01.PB16602	0.806229	blue
F01.PB16658	0.943282	blue
F01.PB16717	0.919054	blue
F01.PB16749	0.715547	blue
F01.PB16791	0.875874	blue
F01.PB16807	0.972501	blue
F01.PB16859	0.7819	blue
F01.PB17070	0.816399	blue
F01.PB17107	0.948832	blue
F01.PB17164	0.8857	blue
F01.PB17285	0.970196	blue
F01.PB17323	0.88114	blue
F01.PB17344	0.888113	blue
F01.PB17585	0.876302	blue
F01.PB17681	0.738997	blue
F01.PB17691	0.916983	blue
F01.PB178	0.867768	blue
F01.PB1781	0.706735	blue
F01.PB17817	0.91873	blue
F01.PB1783	0.830778	blue
F01.PB18060	0.849482	blue
F01.PB18159	0.897039	blue
F01.PB18162	0.894806	blue
F01.PB18165	0.713581	blue
F01.PB18246	0.744017	blue
F01.PB18297	0.7966	blue
F01.PB18335	0.842285	blue
F01.PB18402	0.951421	blue
F01.PB1844	0.88371	blue
F01.PB18597	0.812955	blue
F01.PB18665	0.87916	blue
F01.PB18742	0.88048	blue
F01.PB18750	0.897935	blue
F01.PB18772	0.937172	blue
F01.PB18795	0.825697	blue
F01.PB18838	0.964838	blue
F01.PB1884	0.860082	blue
F01.PB18840	0.9665	blue
F01.PB18904	0.832911	blue
F01.PB19012	0.750783	blue
F01.PB19125	0.894075	blue
F01.PB19263	0.881721	blue
F01.PB19281	0.808205	blue
F01.PB19303	0.853942	blue
F01.PB19356	0.76976	blue
F01.PB19787	0.905256	blue
F01.PB19836	0.717145	blue
F01.PB19860	0.931356	blue
F01.PB19873	0.952041	blue
F01.PB20010	0.894743	blue
F01.PB20113	0.909733	blue
F01.PB20203	0.909919	blue
F01.PB203	0.937242	blue
F01.PB20349	0.90766	blue
F01.PB20352	0.701988	blue
F01.PB20469	0.899503	blue
F01.PB20479	0.790632	blue
F01.PB20582	0.802328	blue
F01.PB20595	0.792697	blue
F01.PB20690	0.843038	blue
F01.PB2079	0.765525	blue
F01.PB20810	0.901729	blue
F01.PB20898	0.764757	blue
F01.PB20915	0.895236	blue
F01.PB21078	0.94382	blue
F01.PB21149	0.845571	blue
F01.PB2115	0.868853	blue
F01.PB2131	0.955663	blue
F01.PB21329	0.76833	blue
F01.PB21372	0.731138	blue
F01.PB21438	0.845747	blue
F01.PB2144	0.915153	blue
F01.PB21455	0.873021	blue
F01.PB21491	0.876775	blue
F01.PB21706	0.940986	blue
F01.PB21715	0.840147	blue
F01.PB21780	0.752745	blue
F01.PB218	0.952704	blue
F01.PB22084	0.959589	blue
F01.PB22109	0.758785	blue
F01.PB22125	0.783995	blue
F01.PB22129	0.774946	blue
F01.PB22193	0.703962	blue
F01.PB22264	0.923833	blue
F01.PB22336	0.859467	blue
F01.PB22353	0.827677	blue
F01.PB22369	0.88097	blue
F01.PB22382	0.932785	blue
F01.PB22563	0.712626	blue
F01.PB22593	0.778673	blue
F01.PB22613	0.96487	blue
F01.PB227	0.790065	blue
F01.PB22705	0.909927	blue
F01.PB22771	0.717416	blue
F01.PB23034	0.951338	blue
F01.PB23038	0.759654	blue
F01.PB23067	0.907181	blue
F01.PB23071	0.806237	blue
F01.PB23171	0.88696	blue
F01.PB23189	0.831422	blue
F01.PB23312	0.845169	blue
F01.PB23353	0.930376	blue
F01.PB23402	0.915196	blue
F01.PB23457	0.871325	blue
F01.PB23541	0.729668	blue
F01.PB23612	0.771213	blue
F01.PB23638	0.835899	blue
F01.PB23656	0.886957	blue
F01.PB23669	0.889513	blue
F01.PB23723	0.749511	blue
F01.PB23787	0.881157	blue
F01.PB23873	0.894898	blue
F01.PB23965	0.785415	blue
F01.PB24031	0.706905	blue
F01.PB24414	0.73504	blue
F01.PB24481	0.842926	blue
F01.PB24587	0.868666	blue
F01.PB24696	0.961415	blue
F01.PB24709	0.701123	blue
F01.PB24760	0.922881	blue
F01.PB24908	0.863356	blue
F01.PB25012	0.924111	blue
F01.PB25068	0.882373	blue
F01.PB25110	0.769212	blue
F01.PB25153	0.862038	blue
F01.PB25414	0.775202	blue
F01.PB25425	0.904898	blue
F01.PB2543	0.854305	blue
F01.PB25491	0.934608	blue
F01.PB25506	0.853025	blue
F01.PB25519	0.927135	blue
F01.PB25526	0.920831	blue
F01.PB25602	0.885216	blue
F01.PB257	0.951305	blue
F01.PB25775	0.838328	blue
F01.PB25823	0.92409	blue
F01.PB25838	0.915014	blue
F01.PB25867	0.893667	blue
F01.PB25935	0.906331	blue
F01.PB25957	0.765837	blue
F01.PB2596	0.767731	blue
F01.PB2600	0.839135	blue
F01.PB26041	0.718643	blue
F01.PB26048	0.948582	blue
F01.PB26112	0.903708	blue
F01.PB26141	0.938716	blue
F01.PB26165	0.736332	blue
F01.PB26250	0.800599	blue
F01.PB26263	0.773068	blue
F01.PB26304	0.843211	blue
F01.PB2635	0.940341	blue
F01.PB26553	0.743222	blue
F01.PB26564	0.848329	blue
F01.PB26626	0.904855	blue
F01.PB26774	0.909196	blue
F01.PB26859	0.896298	blue
F01.PB26869	0.957658	blue
F01.PB27013	0.753079	blue
F01.PB27092	0.872597	blue
F01.PB27195	0.750917	blue
F01.PB27281	0.785126	blue
F01.PB27398	0.959387	blue
F01.PB27463	0.882669	blue
F01.PB27622	0.903993	blue
F01.PB27730	0.771495	blue
F01.PB27792	0.869337	blue
F01.PB27799	0.760397	blue
F01.PB27860	0.812363	blue
F01.PB2787	0.73081	blue
F01.PB27886	0.798283	blue
F01.PB28087	0.779049	blue
F01.PB28095	0.765981	blue
F01.PB28138	0.800157	blue
F01.PB28236	0.800157	blue
F01.PB28249	0.80867	blue
F01.PB28430	0.701549	blue
F01.PB28525	0.775858	blue
F01.PB28589	0.798981	blue
F01.PB28651	0.75728	blue
F01.PB28690	0.971157	blue
F01.PB28740	0.955893	blue
F01.PB2881	0.88779	blue
F01.PB28895	0.784855	blue
F01.PB28942	0.855982	blue
F01.PB29211	0.728584	blue
F01.PB29252	0.713026	blue
F01.PB29280	0.973563	blue
F01.PB29296	0.951657	blue
F01.PB29395	0.873261	blue
F01.PB294	0.928424	blue
F01.PB2949	0.852931	blue
F01.PB29538	0.852002	blue
F01.PB30177	0.863295	blue
F01.PB30240	0.891911	blue
F01.PB30421	0.948849	blue
F01.PB30426	0.934433	blue
F01.PB30461	0.902706	blue
F01.PB30513	0.827705	blue
F01.PB30763	0.746916	blue
F01.PB30832	0.819737	blue
F01.PB30936	0.935718	blue
F01.PB31077	0.896453	blue
F01.PB31187	0.873414	blue
F01.PB31379	0.766759	blue
F01.PB31504	0.788626	blue
F01.PB3161	0.911891	blue
F01.PB31633	0.941122	blue
F01.PB31656	0.701949	blue
F01.PB31701	0.906879	blue
F01.PB31742	0.829183	blue
F01.PB3175	0.904936	blue
F01.PB31802	0.826275	blue
F01.PB3189	0.970408	blue
F01.PB32110	0.847215	blue
F01.PB32390	0.80104	blue
F01.PB32417	0.974828	blue
F01.PB32465	0.877279	blue
F01.PB32550	0.817137	blue
F01.PB32603	0.833032	blue
F01.PB32799	0.881456	blue
F01.PB32834	0.719121	blue
F01.PB33068	0.753633	blue
F01.PB33167	0.848826	blue
F01.PB33220	0.775614	blue
F01.PB3326	0.937595	blue
F01.PB33266	0.928072	blue
F01.PB33280	0.883043	blue
F01.PB33291	0.739776	blue
F01.PB33366	0.801881	blue
F01.PB33428	0.944057	blue
F01.PB33432	0.86893	blue
F01.PB3355	0.804201	blue
F01.PB33790	0.959042	blue
F01.PB33861	0.850603	blue
F01.PB33898	0.830644	blue
F01.PB33906	0.716968	blue
F01.PB33908	0.747538	blue
F01.PB33936	0.714436	blue
F01.PB34064	0.805966	blue
F01.PB34173	0.859811	blue
F01.PB34184	0.831653	blue
F01.PB34408	0.700383	blue
F01.PB34695	0.742697	blue
F01.PB348	0.886696	blue
F01.PB34874	0.852577	blue
F01.PB34902	0.945811	blue
F01.PB34956	0.778246	blue
F01.PB35008	0.85317	blue
F01.PB35642	0.920302	blue
F01.PB35700	0.784621	blue
F01.PB35711	0.953383	blue
F01.PB35730	0.901576	blue
F01.PB35735	0.778001	blue
F01.PB35804	0.972925	blue
F01.PB35806	0.822366	blue
F01.PB35918	0.704958	blue
F01.PB36092	0.939785	blue
F01.PB36109	0.749483	blue
F01.PB3614	0.825852	blue
F01.PB36145	0.931284	blue
F01.PB36161	0.7407	blue
F01.PB36347	0.941062	blue
F01.PB36373	0.880377	blue
F01.PB36410	0.94967	blue
F01.PB36490	0.819392	blue
F01.PB36501	0.8303	blue
F01.PB36719	0.973349	blue
F01.PB36899	0.868629	blue
F01.PB36973	0.942895	blue
F01.PB37220	0.913753	blue
F01.PB37222	0.708156	blue
F01.PB37382	0.817324	blue
F01.PB37435	0.850962	blue
F01.PB37472	0.858018	blue
F01.PB37473	0.77549	blue
F01.PB37491	0.877273	blue
F01.PB37523	0.735752	blue
F01.PB37630	0.928466	blue
F01.PB37690	0.956297	blue
F01.PB379	0.846423	blue
F01.PB37901	0.880355	blue
F01.PB3815	0.854993	blue
F01.PB38244	0.893729	blue
F01.PB3828	0.728043	blue
F01.PB38298	0.974498	blue
F01.PB38299	0.714774	blue
F01.PB38364	0.710482	blue
F01.PB38438	0.81719	blue
F01.PB38454	0.838883	blue
F01.PB38583	0.898719	blue
F01.PB39000	0.752004	blue
F01.PB39056	0.71815	blue
F01.PB39407	0.782641	blue
F01.PB39419	0.783777	blue
F01.PB3942	0.872565	blue
F01.PB39476	0.7836	blue
F01.PB39608	0.707218	blue
F01.PB39790	0.914744	blue
F01.PB39818	0.806455	blue
F01.PB39920	0.84258	blue
F01.PB39939	0.939324	blue
F01.PB3996	0.802182	blue
F01.PB40013	0.866206	blue
F01.PB40049	0.816614	blue
F01.PB40133	0.934179	blue
F01.PB4015	0.84139	blue
F01.PB40165	0.873108	blue
F01.PB40303	0.805466	blue
F01.PB40307	0.804859	blue
F01.PB40315	0.878776	blue
F01.PB40612	0.823011	blue
F01.PB40805	0.810343	blue
F01.PB40896	0.851393	blue
F01.PB40904	0.841171	blue
F01.PB40975	0.816704	blue
F01.PB41022	0.731642	blue
F01.PB41051	0.809591	blue
F01.PB41060	0.985961	blue
F01.PB41158	0.729374	blue
F01.PB41288	0.757321	blue
F01.PB41305	0.784802	blue
F01.PB4146	0.844748	blue
F01.PB41504	0.929809	blue
F01.PB41566	0.734561	blue
F01.PB416	0.829993	blue
F01.PB41643	0.875386	blue
F01.PB41657	0.751297	blue
F01.PB41760	0.871241	blue
F01.PB41839	0.973241	blue
F01.PB41869	0.724186	blue
F01.PB41991	0.901859	blue
F01.PB42083	0.776203	blue
F01.PB42149	0.786734	blue
F01.PB42190	0.728295	blue
F01.PB423	0.956783	blue
F01.PB42419	0.933279	blue
F01.PB42452	0.900662	blue
F01.PB42578	0.858463	blue
F01.PB42678	0.71285	blue
F01.PB42769	0.748393	blue
F01.PB42801	0.742936	blue
F01.PB42878	0.945559	blue
F01.PB43081	0.841136	blue
F01.PB43095	0.810663	blue
F01.PB43123	0.781812	blue
F01.PB4317	0.932746	blue
F01.PB43245	0.719486	blue
F01.PB43324	0.921138	blue
F01.PB43393	0.898207	blue
F01.PB43828	0.807238	blue
F01.PB43898	0.935498	blue
F01.PB43988	0.946094	blue
F01.PB4404	0.729465	blue
F01.PB44096	0.956466	blue
F01.PB4417	0.926879	blue
F01.PB44185	0.865513	blue
F01.PB44394	0.849089	blue
F01.PB44557	0.833892	blue
F01.PB44605	0.826388	blue
F01.PB44665	0.888574	blue
F01.PB44679	0.729885	blue
F01.PB449	0.895167	blue
F01.PB44914	0.748826	blue
F01.PB44964	0.87546	blue
F01.PB44995	0.900197	blue
F01.PB45129	0.782576	blue
F01.PB45435	0.717839	blue
F01.PB45520	0.917277	blue
F01.PB45557	0.895056	blue
F01.PB45594	0.915405	blue
F01.PB45673	0.949357	blue
F01.PB45793	0.885936	blue
F01.PB45887	0.812896	blue
F01.PB45890	0.707937	blue
F01.PB46044	0.822176	blue
F01.PB46268	0.760291	blue
F01.PB46372	0.777047	blue
F01.PB46465	0.87378	blue
F01.PB46575	0.798621	blue
F01.PB4666	0.946947	blue
F01.PB4671	0.769421	blue
F01.PB46932	0.878885	blue
F01.PB46978	0.901868	blue
F01.PB47067	0.946302	blue
F01.PB47163	0.783384	blue
F01.PB47269	0.774603	blue
F01.PB47283	0.907757	blue
F01.PB47638	0.946111	blue
F01.PB4773	0.948325	blue
F01.PB47819	0.923924	blue
F01.PB47993	0.846423	blue
F01.PB4816	0.913575	blue
F01.PB48213	0.706682	blue
F01.PB48223	0.862481	blue
F01.PB48309	0.916822	blue
F01.PB48317	0.775938	blue
F01.PB48414	0.762715	blue
F01.PB48452	0.927808	blue
F01.PB4864	0.856878	blue
F01.PB48686	0.776332	blue
F01.PB488	0.872138	blue
F01.PB48826	0.946532	blue
F01.PB4891	0.835056	blue
F01.PB49011	0.842565	blue
F01.PB49125	0.852468	blue
F01.PB49228	0.734143	blue
F01.PB4976	0.918367	blue
F01.PB4996	0.792159	blue
F01.PB49960	0.827731	blue
F01.PB5055	0.809898	blue
F01.PB50559	0.916471	blue
F01.PB50794	0.936703	blue
F01.PB50849	0.795683	blue
F01.PB50914	0.957996	blue
F01.PB50945	0.816644	blue
F01.PB50968	0.804571	blue
F01.PB5097	0.907034	blue
F01.PB51353	0.72657	blue
F01.PB51376	0.799431	blue
F01.PB51443	0.764039	blue
F01.PB51533	0.88577	blue
F01.PB51536	0.794755	blue
F01.PB51585	0.730616	blue
F01.PB5178	0.719044	blue
F01.PB52299	0.800119	blue
F01.PB52538	0.7235	blue
F01.PB53135	0.786812	blue
F01.PB5331	0.786845	blue
F01.PB53397	0.780419	blue
F01.PB53435	0.906229	blue
F01.PB53561	0.968893	blue
F01.PB53581	0.814487	blue
F01.PB53644	0.712166	blue
F01.PB53724	0.936444	blue
F01.PB5385	0.823545	blue
F01.PB54176	0.948953	blue
F01.PB54253	0.789919	blue
F01.PB54270	0.886316	blue
F01.PB54612	0.760568	blue
F01.PB54702	0.782647	blue
F01.PB54873	0.940166	blue
F01.PB55283	0.746471	blue
F01.PB55534	0.896404	blue
F01.PB55553	0.879513	blue
F01.PB55574	0.718626	blue
F01.PB55697	0.928094	blue
F01.PB557	0.768736	blue
F01.PB5578	0.84726	blue
F01.PB55793	0.764098	blue
F01.PB55873	0.921841	blue
F01.PB5599	0.958754	blue
F01.PB56002	0.790072	blue
F01.PB56068	0.865408	blue
F01.PB56113	0.802585	blue
F01.PB56133	0.796782	blue
F01.PB56158	0.939218	blue
F01.PB56248	0.964273	blue
F01.PB5635	0.766378	blue
F01.PB5640	0.944726	blue
F01.PB5659	0.854279	blue
F01.PB56972	0.820912	blue
F01.PB56998	0.916891	blue
F01.PB56999	0.939095	blue
F01.PB57192	0.716451	blue
F01.PB57394	0.925504	blue
F01.PB57554	0.777052	blue
F01.PB5759	0.778094	blue
F01.PB5777	0.785911	blue
F01.PB57811	0.984767	blue
F01.PB57901	0.921612	blue
F01.PB58340	0.906885	blue
F01.PB585	0.806778	blue
F01.PB58663	0.867545	blue
F01.PB58729	0.893383	blue
F01.PB58767	0.893612	blue
F01.PB58834	0.81895	blue
F01.PB58859	0.79795	blue
F01.PB58907	0.752297	blue
F01.PB59016	0.723478	blue
F01.PB5919	0.950861	blue
F01.PB59239	0.778852	blue
F01.PB59385	0.908937	blue
F01.PB5947	0.910739	blue
F01.PB59505	0.961586	blue
F01.PB59573	0.893113	blue
F01.PB59656	0.717281	blue
F01.PB59767	0.707868	blue
F01.PB59870	0.895533	blue
F01.PB59878	0.941862	blue
F01.PB59987	0.803547	blue
F01.PB60254	0.89932	blue
F01.PB60288	0.744327	blue
F01.PB60290	0.845231	blue
F01.PB60495	0.703251	blue
F01.PB60574	0.948343	blue
F01.PB6063	0.808177	blue
F01.PB60758	0.890466	blue
F01.PB6095	0.865608	blue
F01.PB611	0.79252	blue
F01.PB61104	0.853388	blue
F01.PB61151	0.83893	blue
F01.PB61168	0.906046	blue
F01.PB61207	0.710828	blue
F01.PB61215	0.862224	blue
F01.PB61225	0.796789	blue
F01.PB61273	0.919167	blue
F01.PB6154	0.926531	blue
F01.PB6161	0.804423	blue
F01.PB61659	0.880271	blue
F01.PB61678	0.731462	blue
F01.PB61707	0.954458	blue
F01.PB61734	0.909945	blue
F01.PB61829	0.86509	blue
F01.PB61902	0.859306	blue
F01.PB62	0.75058	blue
F01.PB62095	0.762177	blue
F01.PB62122	0.908218	blue
F01.PB62136	0.742472	blue
F01.PB6219	0.918625	blue
F01.PB62209	0.700769	blue
F01.PB62246	0.95388	blue
F01.PB6231	0.817304	blue
F01.PB62346	0.904431	blue
F01.PB62502	0.862587	blue
F01.PB62614	0.954949	blue
F01.PB62827	0.825328	blue
F01.PB62935	0.725203	blue
F01.PB63119	0.803055	blue
F01.PB63129	0.735202	blue
F01.PB63328	0.940201	blue
F01.PB63519	0.872474	blue
F01.PB63571	0.720762	blue
F01.PB63808	0.856159	blue
F01.PB63816	0.751192	blue
F01.PB63912	0.812493	blue
F01.PB64074	0.953887	blue
F01.PB64112	0.700655	blue
F01.PB64167	0.777171	blue
F01.PB64267	0.778584	blue
F01.PB64330	0.869045	blue
F01.PB64337	0.794527	blue
F01.PB64442	0.728608	blue
F01.PB6449	0.932822	blue
F01.PB64558	0.729056	blue
F01.PB64587	0.903497	blue
F01.PB64744	0.938243	blue
F01.PB64866	0.814122	blue
F01.PB6507	0.760249	blue
F01.PB65087	0.787119	blue
F01.PB65121	0.771318	blue
F01.PB65131	0.739402	blue
F01.PB65528	0.889476	blue
F01.PB65622	0.80071	blue
F01.PB65638	0.776688	blue
F01.PB65769	0.701082	blue
F01.PB65900	0.779791	blue
F01.PB65919	0.859704	blue
F01.PB6592	0.814754	blue
F01.PB65925	0.91317	blue
F01.PB6598	0.871038	blue
F01.PB661	0.83648	blue
F01.PB6620	0.833513	blue
F01.PB66212	0.880827	blue
F01.PB66232	0.764838	blue
F01.PB66332	0.815157	blue
F01.PB66564	0.807225	blue
F01.PB66929	0.900023	blue
F01.PB6696	0.765587	blue
F01.PB6708	0.907011	blue
F01.PB67333	0.821933	blue
F01.PB67503	0.794956	blue
F01.PB6755	0.8305	blue
F01.PB67588	0.943907	blue
F01.PB677	0.907223	blue
F01.PB67772	0.836899	blue
F01.PB6779	0.968131	blue
F01.PB6781	0.869109	blue
F01.PB6796	0.722759	blue
F01.PB68052	0.747941	blue
F01.PB68054	0.90091	blue
F01.PB68138	0.819873	blue
F01.PB68306	0.718274	blue
F01.PB68337	0.858862	blue
F01.PB6836	0.812868	blue
F01.PB68414	0.79244	blue
F01.PB68521	0.710229	blue
F01.PB6886	0.822449	blue
F01.PB68931	0.82569	blue
F01.PB68975	0.88088	blue
F01.PB69191	0.750984	blue
F01.PB69241	0.780409	blue
F01.PB69260	0.940271	blue
F01.PB69388	0.751053	blue
F01.PB69583	0.753786	blue
F01.PB69606	0.944096	blue
F01.PB6963	0.731908	blue
F01.PB69946	0.799784	blue
F01.PB70129	0.77333	blue
F01.PB7018	0.764114	blue
F01.PB70189	0.86858	blue
F01.PB70610	0.825141	blue
F01.PB70683	0.929019	blue
F01.PB7072	0.893129	blue
F01.PB70776	0.864742	blue
F01.PB70929	0.767671	blue
F01.PB71013	0.834546	blue
F01.PB71143	0.892363	blue
F01.PB71198	0.802034	blue
F01.PB71209	0.902206	blue
F01.PB71434	0.905084	blue
F01.PB7157	0.804441	blue
F01.PB716	0.954013	blue
F01.PB71644	0.742043	blue
F01.PB71680	0.763506	blue
F01.PB71763	0.91202	blue
F01.PB71941	0.839946	blue
F01.PB72000	0.800961	blue
F01.PB72127	0.718516	blue
F01.PB72190	0.817131	blue
F01.PB72251	0.798167	blue
F01.PB72330	0.741921	blue
F01.PB72361	0.969606	blue
F01.PB72503	0.912737	blue
F01.PB72597	0.798158	blue
F01.PB72755	0.928304	blue
F01.PB728	0.865908	blue
F01.PB72968	0.76104	blue
F01.PB73135	0.708119	blue
F01.PB73290	0.87889	blue
F01.PB73387	0.893357	blue
F01.PB73497	0.877295	blue
F01.PB73816	0.731069	blue
F01.PB73824	0.887661	blue
F01.PB73981	0.759121	blue
F01.PB7403	0.796304	blue
F01.PB74195	0.735428	blue
F01.PB74871	0.757898	blue
F01.PB74928	0.958579	blue
F01.PB7505	0.924492	blue
F01.PB75274	0.755306	blue
F01.PB75319	0.749928	blue
F01.PB7543	0.91814	blue
F01.PB7552	0.944044	blue
F01.PB75543	0.735742	blue
F01.PB7583	0.91195	blue
F01.PB75860	0.733057	blue
F01.PB76137	0.795782	blue
F01.PB76277	0.859975	blue
F01.PB76368	0.733972	blue
F01.PB76616	0.791116	blue
F01.PB7662	0.81957	blue
F01.PB76625	0.793747	blue
F01.PB7667	0.862637	blue
F01.PB767	0.840812	blue
F01.PB77004	0.780034	blue
F01.PB77013	0.842857	blue
F01.PB77386	0.819303	blue
F01.PB775	0.951339	blue
F01.PB77666	0.886476	blue
F01.PB77766	0.936354	blue
F01.PB78053	0.853506	blue
F01.PB78134	0.873754	blue
F01.PB78151	0.838103	blue
F01.PB78451	0.741854	blue
F01.PB7851	0.715813	blue
F01.PB78644	0.836182	blue
F01.PB78901	0.966684	blue
F01.PB79158	0.8816	blue
F01.PB79487	0.727567	blue
F01.PB7962	0.911085	blue
F01.PB7977	0.904491	blue
F01.PB79781	0.899681	blue
F01.PB8012	0.879638	blue
F01.PB80174	0.957482	blue
F01.PB80389	0.917348	blue
F01.PB80393	0.968093	blue
F01.PB8048	0.877177	blue
F01.PB805	0.97247	blue
F01.PB8066	0.898187	blue
F01.PB80727	0.848198	blue
F01.PB8074	0.921286	blue
F01.PB8075	0.972088	blue
F01.PB80770	0.806402	blue
F01.PB80804	0.735221	blue
F01.PB80955	0.744619	blue
F01.PB81076	0.835695	blue
F01.PB81396	0.93707	blue
F01.PB81424	0.923392	blue
F01.PB81561	0.843697	blue
F01.PB82175	0.831465	blue
F01.PB8227	0.861626	blue
F01.PB82309	0.863379	blue
F01.PB8240	0.833858	blue
F01.PB8247	0.892917	blue
F01.PB827	0.773017	blue
F01.PB8272	0.796077	blue
F01.PB82808	0.866818	blue
F01.PB82862	0.906248	blue
F01.PB831	0.941944	blue
F01.PB83131	0.790771	blue
F01.PB83133	0.741061	blue
F01.PB8328	0.901919	blue
F01.PB835	0.975332	blue
F01.PB8414	0.883128	blue
F01.PB84415	0.851957	blue
F01.PB84584	0.742639	blue
F01.PB8477	0.944738	blue
F01.PB84915	0.908833	blue
F01.PB8496	0.71397	blue
F01.PB85216	0.829669	blue
F01.PB85243	0.889255	blue
F01.PB85476	0.844113	blue
F01.PB85526	0.832585	blue
F01.PB85584	0.833508	blue
F01.PB85648	0.759595	blue
F01.PB85813	0.71568	blue
F01.PB85895	0.769271	blue
F01.PB859	0.800309	blue
F01.PB85908	0.868648	blue
F01.PB85919	0.919637	blue
F01.PB86012	0.965151	blue
F01.PB86025	0.770482	blue
F01.PB86136	0.893411	blue
F01.PB86138	0.947391	blue
F01.PB86142	0.882746	blue
F01.PB86217	0.951752	blue
F01.PB8623	0.811053	blue
F01.PB86379	0.827172	blue
F01.PB86400	0.791639	blue
F01.PB86444	0.791919	blue
F01.PB86447	0.75574	blue
F01.PB86532	0.828191	blue
F01.PB8656	0.972797	blue
F01.PB86573	0.712437	blue
F01.PB86594	0.930276	blue
F01.PB86647	0.777468	blue
F01.PB86651	0.852994	blue
F01.PB86801	0.941218	blue
F01.PB86834	0.88782	blue
F01.PB86981	0.912947	blue
F01.PB870	0.923106	blue
F01.PB87022	0.855219	blue
F01.PB87101	0.90128	blue
F01.PB87139	0.877147	blue
F01.PB87191	0.899692	blue
F01.PB87212	0.728577	blue
F01.PB87222	0.807976	blue
F01.PB87308	0.882315	blue
F01.PB87317	0.744566	blue
F01.PB87399	0.975907	blue
F01.PB8741	0.772102	blue
F01.PB87445	0.883047	blue
F01.PB87499	0.790131	blue
F01.PB87502	0.919442	blue
F01.PB87755	0.760838	blue
F01.PB87759	0.965257	blue
F01.PB879	0.80998	blue
F01.PB87992	0.958927	blue
F01.PB88109	0.888818	blue
F01.PB88188	0.847269	blue
F01.PB88273	0.752498	blue
F01.PB88615	0.920495	blue
F01.PB88616	0.850095	blue
F01.PB88625	0.929598	blue
F01.PB88661	0.850906	blue
F01.PB88676	0.940804	blue
F01.PB8879	0.879469	blue
F01.PB88922	0.714398	blue
F01.PB88923	0.968777	blue
F01.PB89335	0.818377	blue
F01.PB89344	0.72454	blue
F01.PB89353	0.889907	blue
F01.PB89382	0.956924	blue
F01.PB89466	0.806301	blue
F01.PB89518	0.948221	blue
F01.PB89557	0.765681	blue
F01.PB89593	0.849775	blue
F01.PB8963	0.925105	blue
F01.PB8966	0.827691	blue
F01.PB89720	0.910963	blue
F01.PB89917	0.924198	blue
F01.PB89918	0.817769	blue
F01.PB89962	0.890727	blue
F01.PB90023	0.925848	blue
F01.PB90247	0.862224	blue
F01.PB90318	0.924048	blue
F01.PB90323	0.801221	blue
F01.PB90340	0.927462	blue
F01.PB90472	0.84237	blue
F01.PB90490	0.730999	blue
F01.PB90510	0.745365	blue
F01.PB90523	0.933895	blue
F01.PB90562	0.932451	blue
F01.PB90627	0.888714	blue
F01.PB90785	0.810588	blue
F01.PB90790	0.837514	blue
F01.PB91113	0.779049	blue
F01.PB91152	0.956184	blue
F01.PB9140	0.752382	blue
F01.PB91469	0.965698	blue
F01.PB91606	0.963599	blue
F01.PB91611	0.931676	blue
F01.PB91732	0.934572	blue
F01.PB91955	0.766579	blue
F01.PB92016	0.971539	blue
F01.PB92024	0.923302	blue
F01.PB9210	0.745212	blue
F01.PB92264	0.950405	blue
F01.PB92337	0.912023	blue
F01.PB9237	0.93092	blue
F01.PB92669	0.869881	blue
F01.PB92817	0.718392	blue
F01.PB92834	0.765859	blue
F01.PB92884	0.746742	blue
F01.PB93007	0.909573	blue
F01.PB93095	0.792383	blue
F01.PB93112	0.763465	blue
F01.PB93117	0.839974	blue
F01.PB93215	0.748116	blue
F01.PB93423	0.852227	blue
F01.PB93466	0.746973	blue
F01.PB9368	0.79694	blue
F01.PB9384	0.852736	blue
F01.PB93915	0.725067	blue
F01.PB94011	0.934091	blue
F01.PB94232	0.863034	blue
F01.PB94401	0.946533	blue
F01.PB94436	0.836367	blue
F01.PB9468	0.966249	blue
F01.PB94802	0.767186	blue
F01.PB94867	0.709983	blue
F01.PB95019	0.731502	blue
F01.PB95504	0.713288	blue
F01.PB95909	0.753852	blue
F01.PB95918	0.772559	blue
F01.PB95987	0.96262	blue
F01.PB96027	0.73761	blue
F01.PB9612	0.937438	blue
F01.PB96227	0.874994	blue
F01.PB96302	0.846231	blue
F01.PB9632	0.794939	blue
F01.PB96377	0.816358	blue
F01.PB96411	0.927307	blue
F01.PB96436	0.846071	blue
F01.PB96508	0.791037	blue
F01.PB96828	0.804812	blue
F01.PB96874	0.701234	blue
F01.PB96881	0.840817	blue
F01.PB96894	0.847698	blue
F01.PB97005	0.871994	blue
F01.PB97016	0.934361	blue
F01.PB97234	0.866783	blue
F01.PB97462	0.895624	blue
F01.PB97825	0.908417	blue
F01.PB97883	0.793074	blue
F01.PB98100	0.773966	blue
F01.PB98187	0.752374	blue
F01.PB98261	0.960655	blue
F01.PB98297	0.854761	blue
F01.PB984	0.843894	blue
F01.PB98417	0.769863	blue
F01.PB98474	0.926432	blue
F01.PB98585	0.774228	blue
F01.PB98590	0.821059	blue
F01.PB98696	0.762182	blue
F01.PB98826	0.790986	blue
F01.PB9885	0.757258	blue
F01.PB98859	0.951685	blue
F01.PB99000	0.988365	blue
F01.PB9904	0.810916	blue
F01.PB99189	0.892041	blue
F01.PB99211	0.781085	blue
F01.PB99333	0.791353	blue
F01.PB9935	0.976934	blue
F01.PB99505	0.736551	blue
F01.PB99613	0.785803	blue
F01.PB997	0.743604	blue
F01.PB99919	0.81179	blue
F01.PB100108	0.784251	skyblue3
F01.PB10024	0.825091	skyblue3
F01.PB10059	0.725659	skyblue3
F01.PB100823	0.736897	skyblue3
F01.PB100945	0.833384	skyblue3
F01.PB101872	0.795223	skyblue3
F01.PB101890	0.766584	skyblue3
F01.PB102149	0.723688	skyblue3
F01.PB102538	0.72605	skyblue3
F01.PB103210	0.793175	skyblue3
F01.PB103275	0.755761	skyblue3
F01.PB103570	0.826647	skyblue3
F01.PB104501	0.740665	skyblue3
F01.PB104624	0.749494	skyblue3
F01.PB104629	0.834267	skyblue3
F01.PB105049	0.757136	skyblue3
F01.PB1052	0.834864	skyblue3
F01.PB10561	0.715806	skyblue3
F01.PB105770	0.722853	skyblue3
F01.PB105924	0.774811	skyblue3
F01.PB106674	0.786611	skyblue3
F01.PB106709	0.70108	skyblue3
F01.PB10688	0.906267	skyblue3
F01.PB106890	0.806574	skyblue3
F01.PB106971	0.708075	skyblue3
F01.PB107131	0.804123	skyblue3
F01.PB107536	0.894616	skyblue3
F01.PB107675	0.793513	skyblue3
F01.PB107769	0.772997	skyblue3
F01.PB108288	0.792402	skyblue3
F01.PB108636	0.79353	skyblue3
F01.PB10904	0.902958	skyblue3
F01.PB109436	0.725655	skyblue3
F01.PB109438	0.733188	skyblue3
F01.PB109620	0.782699	skyblue3
F01.PB109932	0.892885	skyblue3
F01.PB110057	0.74987	skyblue3
F01.PB1101	0.738189	skyblue3
F01.PB110473	0.752345	skyblue3
F01.PB110597	0.752076	skyblue3
F01.PB110717	0.806509	skyblue3
F01.PB110728	0.754233	skyblue3
F01.PB111017	0.786557	skyblue3
F01.PB111651	0.707479	skyblue3
F01.PB11167	0.849255	skyblue3
F01.PB112	0.785362	skyblue3
F01.PB112062	0.730771	skyblue3
F01.PB11218	0.814221	skyblue3
F01.PB11230	0.704015	skyblue3
F01.PB112321	0.714876	skyblue3
F01.PB112358	0.713579	skyblue3
F01.PB112382	0.739012	skyblue3
F01.PB1129	0.890177	skyblue3
F01.PB113206	0.871232	skyblue3
F01.PB113299	0.791272	skyblue3
F01.PB113585	0.70662	skyblue3
F01.PB114019	0.838418	skyblue3
F01.PB114077	0.927098	skyblue3
F01.PB114101	0.768112	skyblue3
F01.PB114275	0.777135	skyblue3
F01.PB114621	0.816088	skyblue3
F01.PB11912	0.754269	skyblue3
F01.PB12111	0.773354	skyblue3
F01.PB12395	0.828466	skyblue3
F01.PB12451	0.854623	skyblue3
F01.PB12799	0.795926	skyblue3
F01.PB12812	0.713381	skyblue3
F01.PB12902	0.721999	skyblue3
F01.PB13028	0.743875	skyblue3
F01.PB13057	0.735253	skyblue3
F01.PB13314	0.735998	skyblue3
F01.PB1347	0.806805	skyblue3
F01.PB13520	0.78538	skyblue3
F01.PB13652	0.851623	skyblue3
F01.PB13682	0.845956	skyblue3
F01.PB140	0.962127	skyblue3
F01.PB1414	0.724538	skyblue3
F01.PB14232	0.967221	skyblue3
F01.PB14404	0.864167	skyblue3
F01.PB14481	0.956458	skyblue3
F01.PB14510	0.849387	skyblue3
F01.PB14883	0.725539	skyblue3
F01.PB14948	0.818424	skyblue3
F01.PB15043	0.72945	skyblue3
F01.PB15139	0.71149	skyblue3
F01.PB15295	0.786301	skyblue3
F01.PB15454	0.922731	skyblue3
F01.PB15580	0.862829	skyblue3
F01.PB15627	0.748349	skyblue3
F01.PB15891	0.921692	skyblue3
F01.PB15966	0.710767	skyblue3
F01.PB16383	0.867713	skyblue3
F01.PB16520	0.797598	skyblue3
F01.PB16599	0.799375	skyblue3
F01.PB16764	0.779559	skyblue3
F01.PB16842	0.765479	skyblue3
F01.PB16953	0.889215	skyblue3
F01.PB17164	0.714817	skyblue3
F01.PB17292	0.759596	skyblue3
F01.PB17542	0.813964	skyblue3
F01.PB17585	0.773664	skyblue3
F01.PB17682	0.865349	skyblue3
F01.PB1783	0.859343	skyblue3
F01.PB17935	0.711151	skyblue3
F01.PB18264	0.816637	skyblue3
F01.PB18276	0.932227	skyblue3
F01.PB18490	0.773187	skyblue3
F01.PB18563	0.824302	skyblue3
F01.PB18616	0.881321	skyblue3
F01.PB19173	0.879984	skyblue3
F01.PB19207	0.926903	skyblue3
F01.PB1927	0.921769	skyblue3
F01.PB19298	0.834955	skyblue3
F01.PB19356	0.913634	skyblue3
F01.PB19519	0.733427	skyblue3
F01.PB1960	0.727073	skyblue3
F01.PB20593	0.762039	skyblue3
F01.PB20595	0.833859	skyblue3
F01.PB20964	0.751312	skyblue3
F01.PB21166	0.768296	skyblue3
F01.PB21205	0.786317	skyblue3
F01.PB21372	0.942109	skyblue3
F01.PB21373	0.705661	skyblue3
F01.PB21438	0.786912	skyblue3
F01.PB2144	0.799697	skyblue3
F01.PB21634	0.71177	skyblue3
F01.PB22180	0.870148	skyblue3
F01.PB22211	0.777557	skyblue3
F01.PB22264	0.754157	skyblue3
F01.PB22394	0.715755	skyblue3
F01.PB22593	0.72982	skyblue3
F01.PB227	0.784634	skyblue3
F01.PB2275	0.925918	skyblue3
F01.PB22771	0.74412	skyblue3
F01.PB23021	0.923029	skyblue3
F01.PB23230	0.767649	skyblue3
F01.PB23278	0.77194	skyblue3
F01.PB23312	0.743049	skyblue3
F01.PB23325	0.833645	skyblue3
F01.PB23383	0.810644	skyblue3
F01.PB23522	0.766529	skyblue3
F01.PB24336	0.727621	skyblue3
F01.PB25140	0.771197	skyblue3
F01.PB25425	0.73491	skyblue3
F01.PB25526	0.710936	skyblue3
F01.PB2569	0.861356	skyblue3
F01.PB26445	0.71948	skyblue3
F01.PB26564	0.72199	skyblue3
F01.PB26654	0.869489	skyblue3
F01.PB26758	0.723732	skyblue3
F01.PB26774	0.812401	skyblue3
F01.PB26802	0.920915	skyblue3
F01.PB26869	0.702668	skyblue3
F01.PB26888	0.762548	skyblue3
F01.PB26989	0.720886	skyblue3
F01.PB27092	0.796886	skyblue3
F01.PB2754	0.821597	skyblue3
F01.PB27573	0.705838	skyblue3
F01.PB27786	0.722835	skyblue3
F01.PB27792	0.70852	skyblue3
F01.PB27848	0.805156	skyblue3
F01.PB27860	0.805236	skyblue3
F01.PB27928	0.8325	skyblue3
F01.PB27945	0.831096	skyblue3
F01.PB28249	0.724007	skyblue3
F01.PB28703	0.774394	skyblue3
F01.PB29107	0.774214	skyblue3
F01.PB29288	0.931215	skyblue3
F01.PB29838	0.870041	skyblue3
F01.PB30513	0.734871	skyblue3
F01.PB30528	0.718333	skyblue3
F01.PB30542	0.706874	skyblue3
F01.PB30682	0.936081	skyblue3
F01.PB30759	0.771338	skyblue3
F01.PB30922	0.836309	skyblue3
F01.PB30960	0.853572	skyblue3
F01.PB31045	0.707293	skyblue3
F01.PB31255	0.822959	skyblue3
F01.PB31546	0.882904	skyblue3
F01.PB31713	0.727558	skyblue3
F01.PB3174	0.76256	skyblue3
F01.PB32218	0.765848	skyblue3
F01.PB323	0.755942	skyblue3
F01.PB32390	0.877653	skyblue3
F01.PB32805	0.880241	skyblue3
F01.PB329	0.881997	skyblue3
F01.PB33190	0.78209	skyblue3
F01.PB33269	0.853148	skyblue3
F01.PB33291	0.703057	skyblue3
F01.PB33439	0.862364	skyblue3
F01.PB33734	0.717197	skyblue3
F01.PB33742	0.94953	skyblue3
F01.PB33896	0.771393	skyblue3
F01.PB33908	0.794834	skyblue3
F01.PB34045	0.791671	skyblue3
F01.PB341	0.938126	skyblue3
F01.PB34203	0.801641	skyblue3
F01.PB35357	0.827611	skyblue3
F01.PB35545	0.700454	skyblue3
F01.PB35978	0.706653	skyblue3
F01.PB36161	0.890155	skyblue3
F01.PB36373	0.779224	skyblue3
F01.PB36569	0.882672	skyblue3
F01.PB36850	0.829049	skyblue3
F01.PB37119	0.856762	skyblue3
F01.PB37222	0.889265	skyblue3
F01.PB37324	0.902032	skyblue3
F01.PB37496	0.747183	skyblue3
F01.PB37615	0.898183	skyblue3
F01.PB37616	0.724451	skyblue3
F01.PB37655	0.768469	skyblue3
F01.PB3769	0.761042	skyblue3
F01.PB3778	0.858895	skyblue3
F01.PB38330	0.84442	skyblue3
F01.PB38511	0.700661	skyblue3
F01.PB3897	0.859969	skyblue3
F01.PB39530	0.779377	skyblue3
F01.PB39805	0.777594	skyblue3
F01.PB3996	0.899983	skyblue3
F01.PB40721	0.905645	skyblue3
F01.PB41194	0.828628	skyblue3
F01.PB41504	0.719596	skyblue3
F01.PB416	0.760202	skyblue3
F01.PB41666	0.811729	skyblue3
F01.PB42020	0.721273	skyblue3
F01.PB42600	0.796643	skyblue3
F01.PB43009	0.817863	skyblue3
F01.PB43028	0.716587	skyblue3
F01.PB43920	0.738843	skyblue3
F01.PB44516	0.825298	skyblue3
F01.PB44557	0.738577	skyblue3
F01.PB45673	0.71022	skyblue3
F01.PB45890	0.737027	skyblue3
F01.PB45901	0.739507	skyblue3
F01.PB46465	0.736692	skyblue3
F01.PB46499	0.836325	skyblue3
F01.PB4666	0.732646	skyblue3
F01.PB4671	0.71612	skyblue3
F01.PB46777	0.725577	skyblue3
F01.PB47215	0.766401	skyblue3
F01.PB47573	0.775121	skyblue3
F01.PB47890	0.889326	skyblue3
F01.PB48015	0.796834	skyblue3
F01.PB48191	0.924655	skyblue3
F01.PB48484	0.871451	skyblue3
F01.PB48543	0.792917	skyblue3
F01.PB488	0.778592	skyblue3
F01.PB4884	0.794761	skyblue3
F01.PB49867	0.707332	skyblue3
F01.PB50775	0.884504	skyblue3
F01.PB51585	0.709146	skyblue3
F01.PB5178	0.782653	skyblue3
F01.PB52059	0.78163	skyblue3
F01.PB52288	0.755373	skyblue3
F01.PB52598	0.73162	skyblue3
F01.PB53784	0.799345	skyblue3
F01.PB54021	0.7189	skyblue3
F01.PB54345	0.720802	skyblue3
F01.PB54612	0.895813	skyblue3
F01.PB548	0.71089	skyblue3
F01.PB557	0.865183	skyblue3
F01.PB56448	0.799896	skyblue3
F01.PB5671	0.728703	skyblue3
F01.PB56972	0.715469	skyblue3
F01.PB57192	0.827854	skyblue3
F01.PB57652	0.795048	skyblue3
F01.PB58478	0.75609	skyblue3
F01.PB585	0.805029	skyblue3
F01.PB59016	0.70029	skyblue3
F01.PB59792	0.776019	skyblue3
F01.PB6027	0.877764	skyblue3
F01.PB60505	0.924524	skyblue3
F01.PB60915	0.708377	skyblue3
F01.PB61071	0.717407	skyblue3
F01.PB6113	0.90603	skyblue3
F01.PB61357	0.796836	skyblue3
F01.PB6161	0.788704	skyblue3
F01.PB62164	0.925842	skyblue3
F01.PB6224	0.819182	skyblue3
F01.PB62264	0.72265	skyblue3
F01.PB6231	0.787433	skyblue3
F01.PB62357	0.878242	skyblue3
F01.PB62635	0.710197	skyblue3
F01.PB6385	0.761893	skyblue3
F01.PB64110	0.863418	skyblue3
F01.PB64196	0.75605	skyblue3
F01.PB64526	0.740361	skyblue3
F01.PB648	0.860542	skyblue3
F01.PB64827	0.845701	skyblue3
F01.PB64851	0.738373	skyblue3
F01.PB65250	0.751379	skyblue3
F01.PB65528	0.72466	skyblue3
F01.PB65718	0.738282	skyblue3
F01.PB65744	0.941941	skyblue3
F01.PB65762	0.748175	skyblue3
F01.PB6660	0.925178	skyblue3
F01.PB66665	0.78782	skyblue3
F01.PB67294	0.715812	skyblue3
F01.PB6804	0.701566	skyblue3
F01.PB6878	0.916511	skyblue3
F01.PB69192	0.747081	skyblue3
F01.PB69388	0.817613	skyblue3
F01.PB6963	0.823297	skyblue3
F01.PB70129	0.790079	skyblue3
F01.PB70282	0.819599	skyblue3
F01.PB7054	0.839357	skyblue3
F01.PB7110	0.797811	skyblue3
F01.PB7185	0.923424	skyblue3
F01.PB72000	0.752132	skyblue3
F01.PB72597	0.774953	skyblue3
F01.PB7289	0.821426	skyblue3
F01.PB72942	0.888906	skyblue3
F01.PB7343	0.755741	skyblue3
F01.PB7355	0.71215	skyblue3
F01.PB73816	0.784454	skyblue3
F01.PB73857	0.872219	skyblue3
F01.PB7392	0.872158	skyblue3
F01.PB74871	0.702679	skyblue3
F01.PB74950	0.820492	skyblue3
F01.PB7641	0.709665	skyblue3
F01.PB76525	0.745287	skyblue3
F01.PB768	0.800109	skyblue3
F01.PB7686	0.832125	skyblue3
F01.PB7728	0.813647	skyblue3
F01.PB78053	0.769737	skyblue3
F01.PB7851	0.755528	skyblue3
F01.PB7885	0.778135	skyblue3
F01.PB7911	0.932642	skyblue3
F01.PB795	0.806905	skyblue3
F01.PB8007	0.935672	skyblue3
F01.PB80091	0.798189	skyblue3
F01.PB8012	0.781179	skyblue3
F01.PB8066	0.724044	skyblue3
F01.PB80773	0.785478	skyblue3
F01.PB81153	0.736646	skyblue3
F01.PB81396	0.711056	skyblue3
F01.PB82309	0.730123	skyblue3
F01.PB83057	0.751565	skyblue3
F01.PB832	0.969975	skyblue3
F01.PB8332	0.746506	skyblue3
F01.PB83664	0.732955	skyblue3
F01.PB84544	0.720571	skyblue3
F01.PB84781	0.856416	skyblue3
F01.PB85552	0.711764	skyblue3
F01.PB85758	0.706826	skyblue3
F01.PB85919	0.716931	skyblue3
F01.PB8600	0.713633	skyblue3
F01.PB86025	0.813294	skyblue3
F01.PB86218	0.883028	skyblue3
F01.PB863	0.873144	skyblue3
F01.PB86426	0.853861	skyblue3
F01.PB86478	0.756647	skyblue3
F01.PB86675	0.922311	skyblue3
F01.PB86834	0.763404	skyblue3
F01.PB86851	0.893066	skyblue3
F01.PB8711	0.971925	skyblue3
F01.PB87191	0.71999	skyblue3
F01.PB87212	0.779008	skyblue3
F01.PB87293	0.784354	skyblue3
F01.PB8741	0.785504	skyblue3
F01.PB87768	0.936189	skyblue3
F01.PB87860	0.919666	skyblue3
F01.PB88486	0.938233	skyblue3
F01.PB886	0.897746	skyblue3
F01.PB8879	0.814316	skyblue3
F01.PB88807	0.719545	skyblue3
F01.PB89077	0.717887	skyblue3
F01.PB89096	0.757448	skyblue3
F01.PB89110	0.829874	skyblue3
F01.PB89450	0.889503	skyblue3
F01.PB90023	0.747902	skyblue3
F01.PB90074	0.76971	skyblue3
F01.PB90081	0.832923	skyblue3
F01.PB9056	0.750265	skyblue3
F01.PB90562	0.730608	skyblue3
F01.PB90868	0.851468	skyblue3
F01.PB90908	0.708369	skyblue3
F01.PB91113	0.849763	skyblue3
F01.PB9140	0.731388	skyblue3
F01.PB91449	0.744668	skyblue3
F01.PB91519	0.762364	skyblue3
F01.PB91529	0.790457	skyblue3
F01.PB91642	0.756226	skyblue3
F01.PB91975	0.70143	skyblue3
F01.PB92055	0.733769	skyblue3
F01.PB9210	0.720153	skyblue3
F01.PB92141	0.75868	skyblue3
F01.PB92315	0.756807	skyblue3
F01.PB92884	0.899627	skyblue3
F01.PB93466	0.894151	skyblue3
F01.PB9368	0.870011	skyblue3
F01.PB9415	0.77849	skyblue3
F01.PB94818	0.732055	skyblue3
F01.PB94910	0.735959	skyblue3
F01.PB95024	0.975106	skyblue3
F01.PB95824	0.712512	skyblue3
F01.PB96320	0.739553	skyblue3
F01.PB96353	0.795432	skyblue3
F01.PB96411	0.729276	skyblue3
F01.PB96436	0.727283	skyblue3
F01.PB96527	0.92998	skyblue3
F01.PB96881	0.881099	skyblue3
F01.PB96887	0.764566	skyblue3
F01.PB97666	0.868754	skyblue3
F01.PB97813	0.759908	skyblue3
F01.PB98100	0.750296	skyblue3
F01.PB98165	0.85953	skyblue3
F01.PB98704	0.715222	skyblue3
F01.PB99008	0.793543	skyblue3
F01.PB99131	0.807233	skyblue3
F01.PB99255	0.840977	skyblue3
F01.PB99579	0.709521	skyblue3
F01.PB99613	0.803392	skyblue3
F01.PB100447	0.76018	grey60
F01.PB100567	0.729252	grey60
F01.PB100935	0.846587	grey60
F01.PB101180	0.780622	grey60
F01.PB101236	0.756687	grey60
F01.PB10140	0.749802	grey60
F01.PB101800	0.741081	grey60
F01.PB10202	0.803905	grey60
F01.PB102050	0.78947	grey60
F01.PB102572	0.717879	grey60
F01.PB102674	0.788739	grey60
F01.PB102713	0.749172	grey60
F01.PB102787	0.89199	grey60
F01.PB103195	0.731561	grey60
F01.PB103359	0.722288	grey60
F01.PB103380	0.80909	grey60
F01.PB103434	0.871905	grey60
F01.PB10345	0.906557	grey60
F01.PB103464	0.709551	grey60
F01.PB1035	0.761544	grey60
F01.PB103589	0.820012	grey60
F01.PB10361	0.87031	grey60
F01.PB103934	0.758627	grey60
F01.PB103944	0.796113	grey60
F01.PB104038	0.871492	grey60
F01.PB104046	0.783597	grey60
F01.PB104188	0.701306	grey60
F01.PB104201	0.736672	grey60
F01.PB104250	0.769249	grey60
F01.PB104265	0.863467	grey60
F01.PB104287	0.763811	grey60
F01.PB104570	0.794081	grey60
F01.PB104571	0.846981	grey60
F01.PB10465	0.941774	grey60
F01.PB104759	0.850316	grey60
F01.PB104796	0.706306	grey60
F01.PB104843	0.763209	grey60
F01.PB10532	0.711353	grey60
F01.PB1054	0.731049	grey60
F01.PB105586	0.774998	grey60
F01.PB105643	0.721172	grey60
F01.PB105654	0.888531	grey60
F01.PB105671	0.79731	grey60
F01.PB105751	0.7157	grey60
F01.PB106096	0.833284	grey60
F01.PB106184	0.752517	grey60
F01.PB106204	0.73354	grey60
F01.PB106287	0.804354	grey60
F01.PB106319	0.755968	grey60
F01.PB106333	0.827964	grey60
F01.PB106377	0.730434	grey60
F01.PB106453	0.820581	grey60
F01.PB106500	0.750569	grey60
F01.PB106697	0.712364	grey60
F01.PB106899	0.782719	grey60
F01.PB107118	0.754569	grey60
F01.PB10717	0.777125	grey60
F01.PB107335	0.722562	grey60
F01.PB107387	0.737246	grey60
F01.PB107800	0.74808	grey60
F01.PB107941	0.712911	grey60
F01.PB107949	0.742975	grey60
F01.PB108143	0.725663	grey60
F01.PB108199	0.884094	grey60
F01.PB108291	0.835531	grey60
F01.PB108326	0.808251	grey60
F01.PB108348	0.703345	grey60
F01.PB108448	0.796449	grey60
F01.PB108660	0.896633	grey60
F01.PB108761	0.855998	grey60
F01.PB10886	0.807392	grey60
F01.PB109147	0.887625	grey60
F01.PB109194	0.883046	grey60
F01.PB109284	0.745711	grey60
F01.PB10934	0.809342	grey60
F01.PB109348	0.701912	grey60
F01.PB109442	0.801039	grey60
F01.PB10950	0.732986	grey60
F01.PB109629	0.731009	grey60
F01.PB109631	0.818826	grey60
F01.PB109739	0.949921	grey60
F01.PB109837	0.756571	grey60
F01.PB109996	0.863034	grey60
F01.PB110009	0.746342	grey60
F01.PB110037	0.787125	grey60
F01.PB110115	0.794974	grey60
F01.PB110431	0.807791	grey60
F01.PB110480	0.853088	grey60
F01.PB110840	0.777756	grey60
F01.PB110921	0.70764	grey60
F01.PB111014	0.776429	grey60
F01.PB11112	0.828146	grey60
F01.PB111173	0.792776	grey60
F01.PB111285	0.727272	grey60
F01.PB111411	0.734935	grey60
F01.PB111455	0.835546	grey60
F01.PB111488	0.855981	grey60
F01.PB111570	0.850114	grey60
F01.PB111652	0.818009	grey60
F01.PB111670	0.772101	grey60
F01.PB111680	0.789748	grey60
F01.PB111768	0.805804	grey60
F01.PB111773	0.767712	grey60
F01.PB1118	0.715752	grey60
F01.PB112028	0.724769	grey60
F01.PB112176	0.735783	grey60
F01.PB112370	0.840022	grey60
F01.PB112510	0.775861	grey60
F01.PB112543	0.760642	grey60
F01.PB112554	0.871306	grey60
F01.PB112688	0.730841	grey60
F01.PB112918	0.856115	grey60
F01.PB112952	0.782663	grey60
F01.PB113046	0.769632	grey60
F01.PB11312	0.775054	grey60
F01.PB113134	0.890908	grey60
F01.PB113506	0.865684	grey60
F01.PB113586	0.729258	grey60
F01.PB113633	0.726882	grey60
F01.PB113673	0.847591	grey60
F01.PB11372	0.763437	grey60
F01.PB113789	0.86346	grey60
F01.PB113883	0.831309	grey60
F01.PB113941	0.732927	grey60
F01.PB114266	0.727176	grey60
F01.PB1148	0.715273	grey60
F01.PB115082	0.810858	grey60
F01.PB11762	0.77787	grey60
F01.PB11774	0.795863	grey60
F01.PB11948	0.830612	grey60
F01.PB12042	0.740498	grey60
F01.PB12172	0.806342	grey60
F01.PB12328	0.795731	grey60
F01.PB12392	0.74256	grey60
F01.PB12601	0.799657	grey60
F01.PB1265	0.753231	grey60
F01.PB12748	0.802981	grey60
F01.PB12788	0.729843	grey60
F01.PB12866	0.819026	grey60
F01.PB12947	0.732037	grey60
F01.PB13001	0.781332	grey60
F01.PB13085	0.739574	grey60
F01.PB13088	0.818637	grey60
F01.PB13273	0.758632	grey60
F01.PB13498	0.793937	grey60
F01.PB13577	0.759748	grey60
F01.PB13581	0.709649	grey60
F01.PB13605	0.724792	grey60
F01.PB13760	0.781222	grey60
F01.PB13807	0.866935	grey60
F01.PB13829	0.865195	grey60
F01.PB1386	0.831515	grey60
F01.PB13912	0.773956	grey60
F01.PB14253	0.771897	grey60
F01.PB14323	0.781831	grey60
F01.PB14381	0.865684	grey60
F01.PB14677	0.735753	grey60
F01.PB14810	0.861909	grey60
F01.PB14987	0.79047	grey60
F01.PB15050	0.709951	grey60
F01.PB15231	0.841988	grey60
F01.PB15742	0.715515	grey60
F01.PB15751	0.874219	grey60
F01.PB15806	0.828338	grey60
F01.PB15845	0.721923	grey60
F01.PB15935	0.703364	grey60
F01.PB16039	0.78166	grey60
F01.PB16095	0.81842	grey60
F01.PB16129	0.83479	grey60
F01.PB16145	0.747754	grey60
F01.PB16342	0.794228	grey60
F01.PB16360	0.796404	grey60
F01.PB16534	0.76059	grey60
F01.PB16543	0.852198	grey60
F01.PB16674	0.786871	grey60
F01.PB16688	0.754775	grey60
F01.PB16828	0.735292	grey60
F01.PB16836	0.749505	grey60
F01.PB16902	0.803314	grey60
F01.PB1698	0.786787	grey60
F01.PB17037	0.70193	grey60
F01.PB1704	0.771004	grey60
F01.PB17300	0.847561	grey60
F01.PB17324	0.829134	grey60
F01.PB17427	0.907214	grey60
F01.PB17505	0.823705	grey60
F01.PB17850	0.730044	grey60
F01.PB18003	0.720097	grey60
F01.PB18089	0.767087	grey60
F01.PB18091	0.704193	grey60
F01.PB18151	0.78526	grey60
F01.PB18206	0.888067	grey60
F01.PB18403	0.889245	grey60
F01.PB18406	0.792713	grey60
F01.PB1853	0.831381	grey60
F01.PB18580	0.842815	grey60
F01.PB18652	0.73733	grey60
F01.PB18736	0.826195	grey60
F01.PB1914	0.854326	grey60
F01.PB19204	0.855239	grey60
F01.PB19296	0.794758	grey60
F01.PB19399	0.851901	grey60
F01.PB19415	0.8513	grey60
F01.PB19424	0.700886	grey60
F01.PB19496	0.750437	grey60
F01.PB19592	0.725066	grey60
F01.PB19617	0.738051	grey60
F01.PB19675	0.774545	grey60
F01.PB1971	0.839849	grey60
F01.PB19745	0.72021	grey60
F01.PB1975	0.78268	grey60
F01.PB19763	0.749111	grey60
F01.PB2012	0.780038	grey60
F01.PB20276	0.731975	grey60
F01.PB20422	0.751936	grey60
F01.PB20623	0.809786	grey60
F01.PB20795	0.794464	grey60
F01.PB20866	0.717472	grey60
F01.PB20994	0.774335	grey60
F01.PB21010	0.76976	grey60
F01.PB21171	0.717359	grey60
F01.PB21695	0.746211	grey60
F01.PB2184	0.70597	grey60
F01.PB21844	0.750814	grey60
F01.PB21871	0.766761	grey60
F01.PB21956	0.816815	grey60
F01.PB2196	0.756136	grey60
F01.PB222	0.70515	grey60
F01.PB22256	0.819837	grey60
F01.PB22517	0.733746	grey60
F01.PB22634	0.741853	grey60
F01.PB22650	0.729796	grey60
F01.PB22673	0.78178	grey60
F01.PB22756	0.717936	grey60
F01.PB2292	0.775595	grey60
F01.PB23113	0.798745	grey60
F01.PB23412	0.759395	grey60
F01.PB23551	0.796576	grey60
F01.PB2413	0.768561	grey60
F01.PB24436	0.787555	grey60
F01.PB24470	0.701137	grey60
F01.PB24544	0.781669	grey60
F01.PB24671	0.818376	grey60
F01.PB24759	0.721576	grey60
F01.PB24882	0.791869	grey60
F01.PB25008	0.783802	grey60
F01.PB2509	0.872391	grey60
F01.PB25347	0.773925	grey60
F01.PB25410	0.877453	grey60
F01.PB25522	0.792433	grey60
F01.PB25615	0.724435	grey60
F01.PB25886	0.709238	grey60
F01.PB26159	0.710407	grey60
F01.PB26281	0.764571	grey60
F01.PB26303	0.742524	grey60
F01.PB26359	0.764187	grey60
F01.PB26411	0.75798	grey60
F01.PB26450	0.755927	grey60
F01.PB2652	0.798616	grey60
F01.PB26603	0.769611	grey60
F01.PB26756	0.781511	grey60
F01.PB26803	0.823239	grey60
F01.PB26866	0.733016	grey60
F01.PB26991	0.796891	grey60
F01.PB27050	0.720334	grey60
F01.PB27138	0.958588	grey60
F01.PB27241	0.91008	grey60
F01.PB27252	0.740284	grey60
F01.PB27385	0.815037	grey60
F01.PB27387	0.705118	grey60
F01.PB27388	0.711425	grey60
F01.PB27635	0.756604	grey60
F01.PB27664	0.701635	grey60
F01.PB27801	0.708957	grey60
F01.PB27864	0.736182	grey60
F01.PB27866	0.719582	grey60
F01.PB28121	0.814482	grey60
F01.PB28147	0.770483	grey60
F01.PB28329	0.761095	grey60
F01.PB28396	0.721708	grey60
F01.PB28406	0.715663	grey60
F01.PB28465	0.717512	grey60
F01.PB28497	0.805249	grey60
F01.PB28609	0.800119	grey60
F01.PB28628	0.76618	grey60
F01.PB28861	0.852797	grey60
F01.PB2888	0.878621	grey60
F01.PB28889	0.77483	grey60
F01.PB28945	0.90069	grey60
F01.PB29207	0.711253	grey60
F01.PB29425	0.780115	grey60
F01.PB29467	0.783408	grey60
F01.PB29766	0.750303	grey60
F01.PB2983	0.718623	grey60
F01.PB30131	0.880124	grey60
F01.PB30162	0.804846	grey60
F01.PB30289	0.749794	grey60
F01.PB30301	0.718292	grey60
F01.PB30503	0.791175	grey60
F01.PB30804	0.760993	grey60
F01.PB30838	0.794781	grey60
F01.PB30876	0.909585	grey60
F01.PB30971	0.715378	grey60
F01.PB3101	0.752067	grey60
F01.PB31042	0.803501	grey60
F01.PB31122	0.713066	grey60
F01.PB31160	0.80602	grey60
F01.PB31270	0.707919	grey60
F01.PB31314	0.835077	grey60
F01.PB31444	0.77598	grey60
F01.PB31594	0.727458	grey60
F01.PB31667	0.737105	grey60
F01.PB31704	0.794844	grey60
F01.PB31815	0.755821	grey60
F01.PB31823	0.716676	grey60
F01.PB31892	0.816061	grey60
F01.PB32009	0.800406	grey60
F01.PB32010	0.712931	grey60
F01.PB32081	0.730529	grey60
F01.PB32149	0.815929	grey60
F01.PB32216	0.814256	grey60
F01.PB32463	0.727138	grey60
F01.PB32509	0.935706	grey60
F01.PB3251	0.770692	grey60
F01.PB3252	0.7294	grey60
F01.PB32949	0.839301	grey60
F01.PB33158	0.745913	grey60
F01.PB33334	0.851413	grey60
F01.PB33358	0.814342	grey60
F01.PB33397	0.85683	grey60
F01.PB3350	0.71453	grey60
F01.PB33583	0.71144	grey60
F01.PB33671	0.74608	grey60
F01.PB33877	0.800466	grey60
F01.PB33921	0.811638	grey60
F01.PB34099	0.702596	grey60
F01.PB34242	0.784967	grey60
F01.PB34277	0.752441	grey60
F01.PB34347	0.862211	grey60
F01.PB3452	0.759887	grey60
F01.PB3475	0.791588	grey60
F01.PB3483	0.785691	grey60
F01.PB34937	0.711245	grey60
F01.PB34965	0.714255	grey60
F01.PB35492	0.774138	grey60
F01.PB35608	0.761856	grey60
F01.PB3585	0.784105	grey60
F01.PB35878	0.74154	grey60
F01.PB36115	0.771629	grey60
F01.PB36197	0.703024	grey60
F01.PB362	0.90343	grey60
F01.PB36230	0.720306	grey60
F01.PB3631	0.765093	grey60
F01.PB365	0.842454	grey60
F01.PB36511	0.81026	grey60
F01.PB36631	0.737063	grey60
F01.PB37028	0.789394	grey60
F01.PB3703	0.779757	grey60
F01.PB37211	0.732506	grey60
F01.PB3744	0.734214	grey60
F01.PB3762	0.749083	grey60
F01.PB3775	0.810789	grey60
F01.PB38395	0.798456	grey60
F01.PB38574	0.850211	grey60
F01.PB38585	0.814605	grey60
F01.PB386	0.723784	grey60
F01.PB38829	0.826798	grey60
F01.PB3884	0.907526	grey60
F01.PB38942	0.850048	grey60
F01.PB39085	0.757968	grey60
F01.PB39092	0.773372	grey60
F01.PB39121	0.716453	grey60
F01.PB39183	0.766161	grey60
F01.PB392	0.780087	grey60
F01.PB39306	0.841278	grey60
F01.PB39348	0.718668	grey60
F01.PB39526	0.839061	grey60
F01.PB39595	0.757347	grey60
F01.PB39725	0.776234	grey60
F01.PB3990	0.806148	grey60
F01.PB39911	0.835151	grey60
F01.PB39914	0.709638	grey60
F01.PB40309	0.813604	grey60
F01.PB40540	0.776282	grey60
F01.PB40563	0.916816	grey60
F01.PB40804	0.733082	grey60
F01.PB40962	0.708492	grey60
F01.PB41020	0.854528	grey60
F01.PB41070	0.713144	grey60
F01.PB41232	0.746919	grey60
F01.PB41479	0.868578	grey60
F01.PB41485	0.867413	grey60
F01.PB41700	0.820145	grey60
F01.PB41863	0.711501	grey60
F01.PB42118	0.805835	grey60
F01.PB42119	0.71673	grey60
F01.PB42252	0.720928	grey60
F01.PB42320	0.715317	grey60
F01.PB42321	0.79195	grey60
F01.PB42832	0.864818	grey60
F01.PB42840	0.842639	grey60
F01.PB42880	0.795741	grey60
F01.PB43013	0.725006	grey60
F01.PB43042	0.884386	grey60
F01.PB43190	0.748827	grey60
F01.PB43254	0.798006	grey60
F01.PB43327	0.845841	grey60
F01.PB43358	0.783263	grey60
F01.PB43359	0.754888	grey60
F01.PB43926	0.754807	grey60
F01.PB44027	0.764223	grey60
F01.PB44136	0.793337	grey60
F01.PB44166	0.725291	grey60
F01.PB44199	0.730526	grey60
F01.PB44261	0.777284	grey60
F01.PB44305	0.789849	grey60
F01.PB44323	0.844299	grey60
F01.PB44383	0.861974	grey60
F01.PB44400	0.870189	grey60
F01.PB44418	0.713589	grey60
F01.PB44461	0.833909	grey60
F01.PB44780	0.759302	grey60
F01.PB44806	0.819629	grey60
F01.PB44810	0.821317	grey60
F01.PB44960	0.804364	grey60
F01.PB45007	0.755174	grey60
F01.PB45030	0.764223	grey60
F01.PB45210	0.771276	grey60
F01.PB45232	0.748715	grey60
F01.PB45589	0.742154	grey60
F01.PB45621	0.829585	grey60
F01.PB4584	0.860774	grey60
F01.PB45981	0.725588	grey60
F01.PB46521	0.705413	grey60
F01.PB46569	0.756322	grey60
F01.PB46642	0.770947	grey60
F01.PB4668	0.884974	grey60
F01.PB467	0.70114	grey60
F01.PB46819	0.753759	grey60
F01.PB46830	0.732652	grey60
F01.PB46862	0.779465	grey60
F01.PB46939	0.717453	grey60
F01.PB4760	0.867158	grey60
F01.PB47788	0.768981	grey60
F01.PB48211	0.775528	grey60
F01.PB48394	0.770536	grey60
F01.PB48495	0.775762	grey60
F01.PB48627	0.8619	grey60
F01.PB48634	0.804523	grey60
F01.PB48747	0.833988	grey60
F01.PB48836	0.793504	grey60
F01.PB48840	0.726499	grey60
F01.PB48955	0.764421	grey60
F01.PB4899	0.720724	grey60
F01.PB49056	0.765795	grey60
F01.PB49077	0.845891	grey60
F01.PB49170	0.708711	grey60
F01.PB49397	0.810869	grey60
F01.PB49493	0.765758	grey60
F01.PB4984	0.73123	grey60
F01.PB50590	0.790439	grey60
F01.PB5060	0.813783	grey60
F01.PB50757	0.718119	grey60
F01.PB5082	0.849167	grey60
F01.PB50823	0.72182	grey60
F01.PB51254	0.826232	grey60
F01.PB51276	0.796275	grey60
F01.PB51430	0.711541	grey60
F01.PB51562	0.819435	grey60
F01.PB51687	0.774646	grey60
F01.PB51848	0.82702	grey60
F01.PB51912	0.934118	grey60
F01.PB52023	0.767161	grey60
F01.PB52133	0.773676	grey60
F01.PB52166	0.838939	grey60
F01.PB5221	0.885582	grey60
F01.PB52423	0.713897	grey60
F01.PB5254	0.78706	grey60
F01.PB52720	0.722756	grey60
F01.PB52722	0.84925	grey60
F01.PB52976	0.720641	grey60
F01.PB53008	0.846178	grey60
F01.PB53022	0.70797	grey60
F01.PB53096	0.852844	grey60
F01.PB53211	0.797331	grey60
F01.PB5332	0.718396	grey60
F01.PB53513	0.759518	grey60
F01.PB53574	0.715674	grey60
F01.PB53668	0.700515	grey60
F01.PB54511	0.814638	grey60
F01.PB54773	0.784694	grey60
F01.PB54776	0.777123	grey60
F01.PB54861	0.706287	grey60
F01.PB55205	0.719438	grey60
F01.PB55305	0.728655	grey60
F01.PB55350	0.720308	grey60
F01.PB55446	0.789891	grey60
F01.PB55536	0.79786	grey60
F01.PB5562	0.744252	grey60
F01.PB55648	0.730299	grey60
F01.PB5579	0.821621	grey60
[truncated: 3,527 more rows]
